# Supplementary material for: Arsenic Oxidation and Removal from Water via Core–Shell MnO2@La(OH)3 Nanocomposite Adsorption
Source: MDPI journal article supplement (doi:10.3390/ijerph191710649), 2022-08-26
Supplement: s1 [file s1]

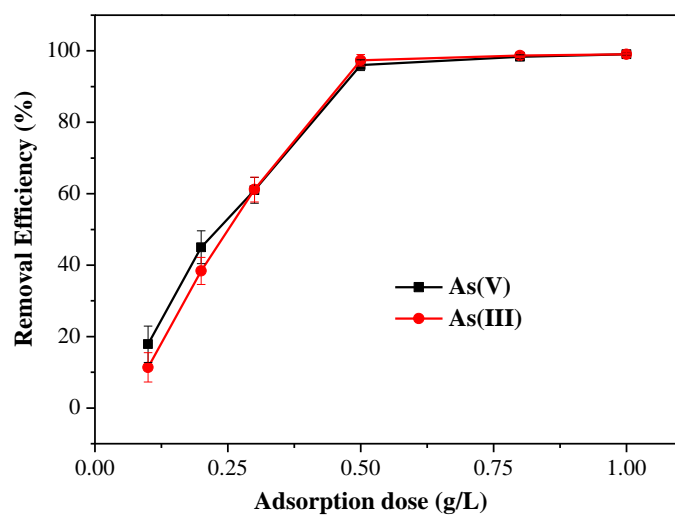

**Fig. S1.** Effect of  $\text{MnO}_2@\text{La}(\text{OH})_3$  dosage on arsenic removal at pH 4.0. Experimental conditions: adsorbent dosage, 0.5 g/L; initial As concentration, 65 mg/L.

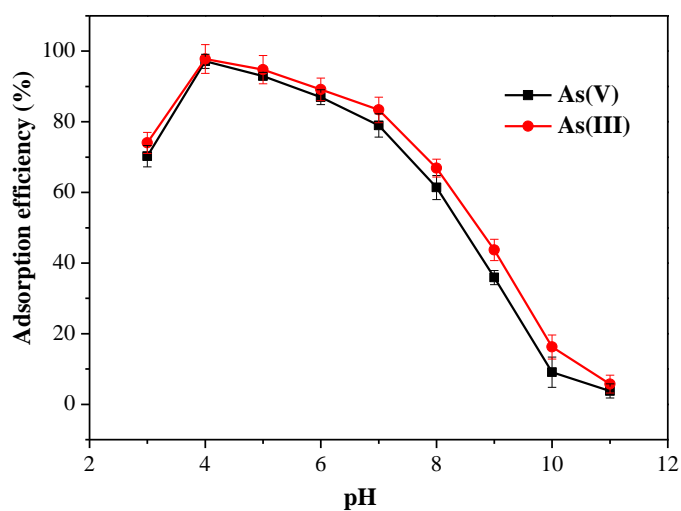

**Fig. S2.** Comparison of the effect of solution pH on As(V) and As(III) removal. Experimental conditions: adsorbent dosage, 0.5 g/L; initial As concentration, 65 mg/L.

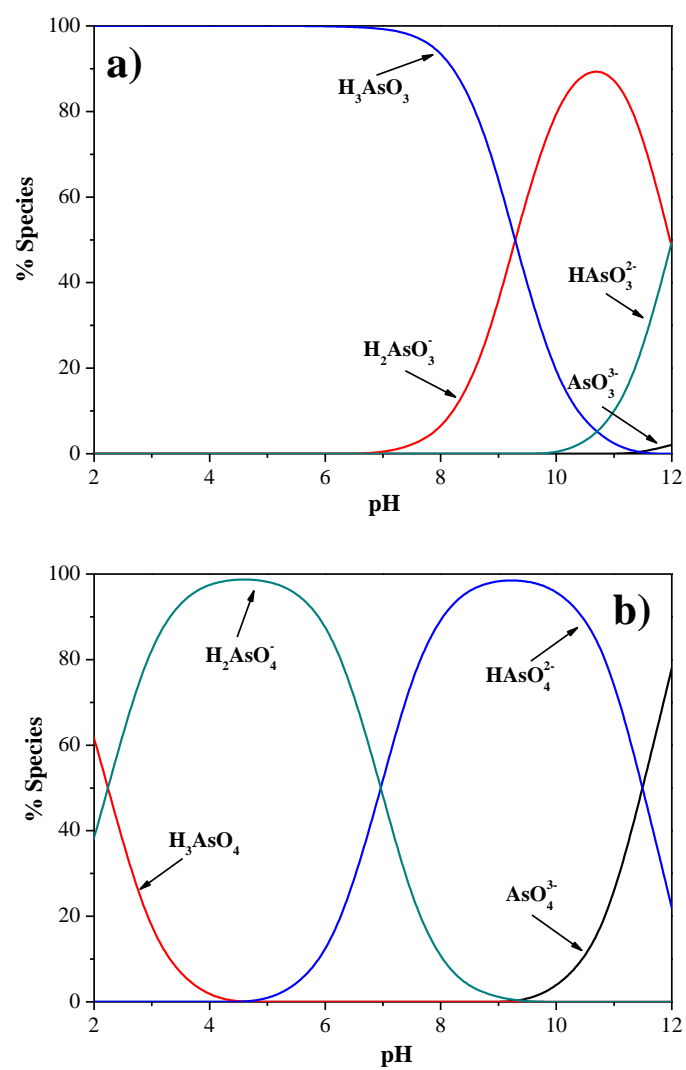

**Fig. S3.** The distribution of arsenic species under different pH: a) As(III), and b) As(V).
